# Supplementary material for: High energy Li-ion capacitors using two-dimensional TiSe0.6S1.4 as insertion host
Source: Royal Society of Chemistry journal article supplement (doi:10.1039/c7ta04470d), 2017-01-01
Supplement: c7ta04470d1.pdf [file c7ta04470d1.pdf]

**Supplementary information**

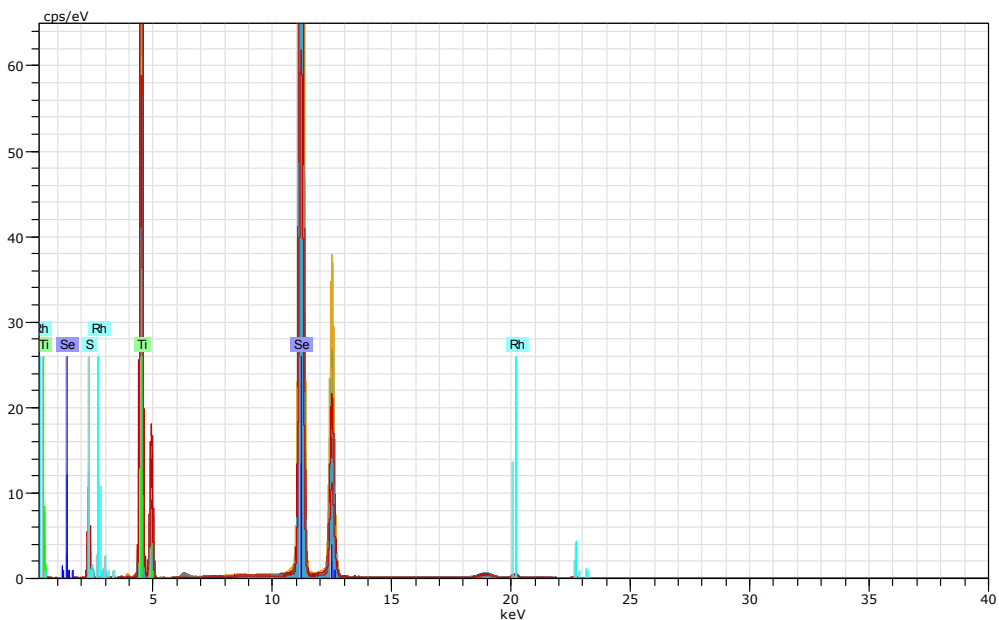

**Figure S1.** XRF Compositional Analysis of  $\text{TiSe}_{0.6}\text{S}_{1.4}$

Mass percent (%)

| Spectrum   | S     | Ti    | Se    |
|------------|-------|-------|-------|
| TiSSe .spx | 26.80 | 38.78 | 34.42 |

Corresponding Atomic percent (%)

| Element | S     | Ti    | Se    |
|---------|-------|-------|-------|
| TiSSe   | 40.19 | 38.76 | 21.05 |

This is very close to ideal (calculated) atomic percent of  $\text{TiS}_{1.4}\text{Se}_{0.6}$

(S → 46.67%, Ti → 33.33%, Se → 20%)

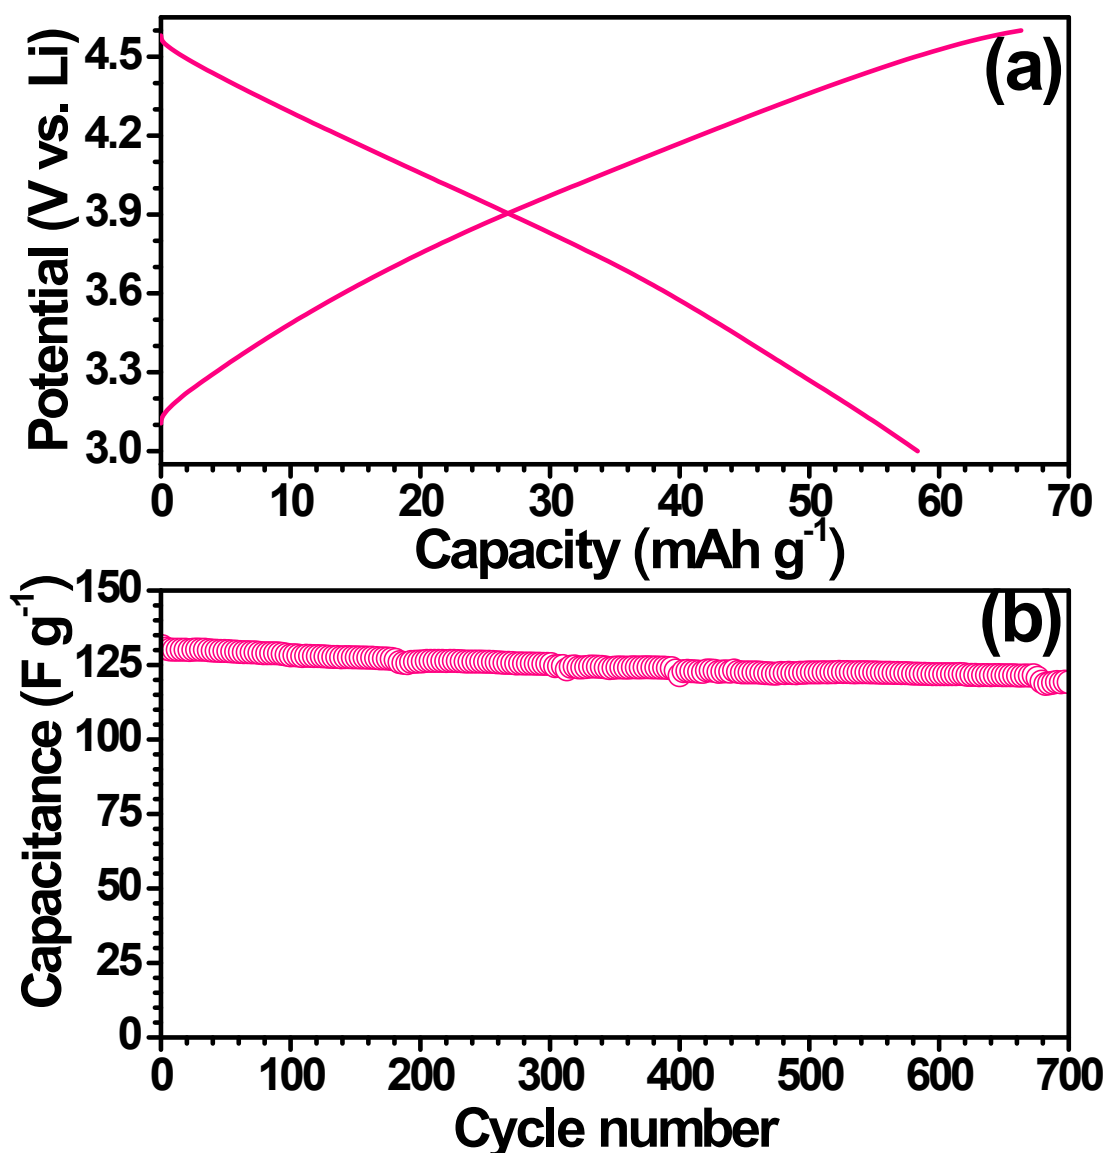

**Figure S2.** Electrochemical performance of AC in half-cell configuration (Li/AC): (a) typical charge-discharge curves recorded between 3-4.6 V vs. Li at a current density of 100 mA g<sup>-1</sup>, and (b) cycling profiles. Active material loading: 10 mg.

The observed capacity can be converted in to specific capacitance according to the following equilibrium,  $C(\text{F g}^{-1}) = \frac{i(\text{A}) \times t(\text{s})}{3600 \times m(\text{g})} = \text{mAh g}^{-1} \times \frac{3600}{dV(\text{mV})}$ , where  $I$  is applied current,  $t$  is discharge time,  $m$  is weight of the active material and  $dV$  is testing window of the AC in half-cell configuration (mV, 1600 mV). The aforesaid equation is valid, if the charge-discharge curves is linear. The observed irreversibility in the half-cell is mainly due to the mild decomposition of the electrolyte, and unstable SEI formation.

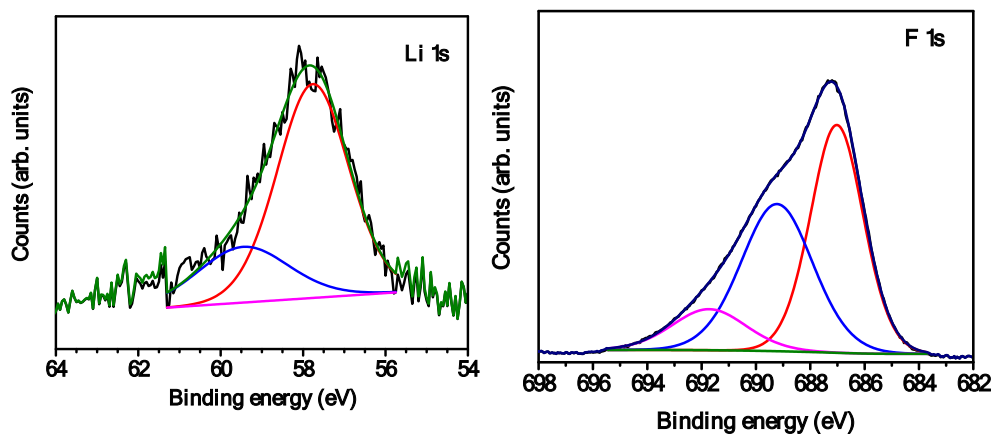

**Figure S3.** The XPS spectra of cycled AC electrode in half-cell assembly.

The core-level spectra of the Li 1s and F 1s. Since, LiF is the predominant by product during the decomposition of the electrolyte solution. The binding energy 685.6 eV is associated with the LiF. This clearly reveals that, there is a mild decomposition of the electrolyte occurs (based on the irreversibility observed in Figure S2), but it is not sufficient to form a stable SEI layer. This observed results are consistent with Naoi *et al.* (*J. Electrochem. Soc.*, 156, A563-A571, 2009)

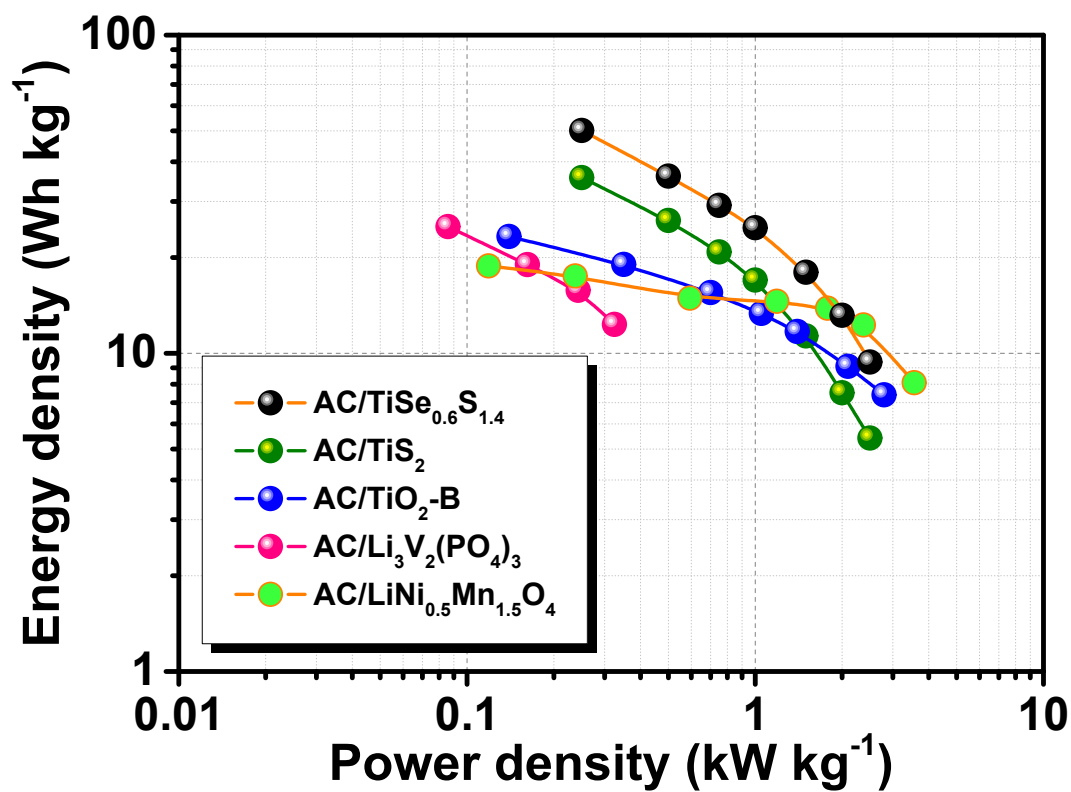

Figure S4. Ragone plot of various LIC configurations including AC/TiSe<sub>0.6</sub>S<sub>1.4</sub>
